# Supplementary material
Source: publisher figshare collection journal article supplement (https://acs.figshare.com/ndownloader/files/5168047)
Supplement: Supplementary file 1 [file 5168047]

Optimized geometry of [Pt2(ì-P2O5H2)4]4- in the singlet ground state with 
E(RB+HF-LYP) =  -4480.27868508

Pt
 P                  1        2.405200
 O                  2        1.526351    1      118.210825
 O                  2        1.622950    1      113.431122    3      125.005238
 P                  1        2.404724    2       89.970023    3     -156.245699
 O                  5        1.526213    1      118.222697    2       22.617353
 O                  5        1.622735    1      113.376366    2      147.594743
 P                  1        2.403810    2       89.992181    3       22.631357
 O                  8        1.526233    1      118.147436    2     -156.289129
 O                  8        1.622154    1      113.387937    2      -31.341680
 P                  1        2.404827    2      178.985423    3      -67.657454
 O                 11        1.526179    1      118.151049    2      -65.972292
 O                 11        1.622907    1      113.375820    2       58.920438
 Pt                 1        3.036892    2       90.523697    3      113.213046
 P                 14        2.405478    1       90.515870    2      179.989729
 O                 15        1.623122   14      113.300073    1      121.948915
 O                 15        1.526590   14      118.118670    1     -113.271222
 P                 14        2.405796    1       90.422358    2      -90.028510
 O                 18        1.623299   14      113.319350    1      121.999457
 O                 18        1.526850   14      118.179548    1     -113.170785
 P                 14        2.405166    1       90.499942    2       -0.043682
 O                 21        1.623758   14      113.293223    1      121.958069
 O                 21        1.526710   14      118.178458    1     -113.195650
 P                 14        2.404316    1       90.455322    2       89.986183
 O                 24        1.526780   14      118.100022    1     -113.241064
 O                 24        1.622872   14      113.362700    1      121.891748
 O                 21        1.665562   14      109.301370    1       11.036399
 O                 18        1.665498   14      109.347865    1       11.006728
 O                 15        1.665768   14      109.316130    1       10.965672
 O                 24        1.665816   14      109.396411    1       11.039432
 H                 10        1.005699    8      111.037055    1       29.876253
 H                  4        1.005909    2      110.965052    1       29.748598
 H                  7        1.005815    5      110.920594    1       29.961019
 H                 13        1.005760   11      110.984592    1       29.574054
 H                 16        1.005583   15      111.047528   14      -29.786810
 H                 19        1.005901   18      111.047567   14      -29.948164
 H                 26        1.005585   24      110.978321   14      -30.171061
 H                 22        1.005862   21      110.925366   14      -30.422399


Optimized geometry of [Pt2(ì-P2O5H2)4]4- in the lowest-lying triplet state with 
E(UB+HF-LYP) =  -4480.17857788  

Pt
 P                  1              B1
 O                  2              B2    1              A1
 O                  2              B3    1              A2    3              D1
 P                  1              B4    2              A3    3              D2
 O                  5              B5    1              A4    2              D3
 O                  5              B6    1              A5    2              D4
 P                  1              B7    2              A6    3              D5
 O                  8              B8    1              A7    2              D6
 O                  8              B9    1              A8    2              D7
 P                  1             B10    2              A9    3              D8
 O                 11             B11    1             A10    2              D9
 O                 11             B12    1             A11    2             D10
 Pt                 1             B13    2             A12    3             D11
 P                 14             B14    1             A13    2             D12
 O                 15             B15   14             A14    1             D13
 O                 15             B16   14             A15    1             D14
 P                 14             B17    1             A16    2             D15
 O                 18             B18   14             A17    1             D16
 O                 18             B19   14             A18    1             D17
 P                 14             B20    1             A19    2             D18
 O                 21             B21   14             A20    1             D19
 O                 21             B22   14             A21    1             D20
 P                 14             B23    1             A22    2             D21
 O                 24             B24   14             A23    1             D22
 O                 24             B25   14             A24    1             D23
 O                  2             B26    1             A25    5             D24
 O                 18             B27   14             A26    1             D25
 O                 15             B28   14             A27    1             D26
 O                  5             B29    1             A28    2             D27
 H                 10             B30    8             A29    1             D28
 H                  4             B31    2             A30    1             D29
 H                  7             B32    5             A31    1             D30
 H                 13             B33   11             A32    1             D31
 H                 16             B34   15             A33   14             D32
 H                 19             B35   18             A34   14             D33
 H                 26             B36   24             A35   14             D34
 H                 22             B37   21             A36   14             D35

   B1             2.419836
   B2             1.525199
   B3             1.621434
   B4             2.418415
   B5             1.524669
   B6             1.621052
   B7             2.421039
   B8             1.525051
   B9             1.621488
   B10            2.420542
   B11            1.525344
   B12            1.621108
   B13            2.820000
   B14            2.419844
   B15            1.621435
   B16            1.525199
   B17            2.418425
   B18            1.621053
   B19            1.524669
   B20            2.420551
   B21            1.621109
   B22            1.525345
   B23            2.421048
   B24            1.525051
   B25            1.621490
   B26            1.665681
   B27            1.665557
   B28            1.665680
   B29            1.665557
   B30            1.005620
   B31            1.005317
   B32            1.005813
   B33            1.005520
   B34            1.005315
   B35            1.005812
   B36            1.005618
   B37            1.005518
   A1           118.194007
   A2           114.079901
   A3            89.870068
   A4           118.483190
   A5           114.038901
   A6            89.771662
   A7           118.378061
   A8           113.859177
   A9           172.765612
   A10          118.414401
   A11          114.017504
   A12           93.563036
   A13           93.562852
   A14          114.080455
   A15          118.194000
   A16           93.728105
   A17          114.039526
   A18          118.483304
   A19           93.671167
   A20          114.018105
   A21          118.414419
   A22           93.319388
   A23          118.378088
   A24          113.859915
   A25          108.463292
   A26          108.096237
   A27          108.463499
   A28          108.096165
   A29          110.912652
   A30          111.020665
   A31          110.870745
   A32          110.931348
   A33          111.020813
   A34          110.870790
   A35          110.912849
   A36          110.931627
   D1           126.263010
   D2          -155.089162
   D3            16.643220
   D4           143.166203
   D5            17.871966
   D6          -156.285926
   D7           -29.998375
   D8           -68.903540
   D9           -68.695599
   D10           57.631177
   D11          111.183585
   D12         -179.998028
   D13          122.549643
   D14         -111.187270
   D15          -89.896042
   D16          123.267652
   D17         -110.209105
   D18           -0.009052
   D19          122.452023
   D20         -111.221101
   D21           90.024237
   D22         -110.161939
   D23          123.550212
   D24           81.372002
   D25           13.431107
   D26           12.351462
   D27         -106.997122
   D28           30.729072
   D29           30.124486
   D30           30.628787
   D31           30.603077
   D32          -30.126776
   D33          -30.631332
   D34          -30.731720
   D35          -30.605549  
 

Singlet excited states of [Pt2(ì-P2O5H2)4]4- in the gas phase based on the SGS geometry

Excited State   1:   Singlet-?Sym    2.9464 eV  420.80 nm  f=0.0000
     164 ->165         0.70611
 This state for optimization and/or second-order correction.
 Total Energy, E(RPA) =  -4480.17040647    
 Copying the excited state density for this state as the 1-particle RhoCI density.
 
 Excited state symmetry could not be determined.
 Excited State   2:   Singlet-?Sym    3.3783 eV  367.00 nm  f=0.2150
     164 ->166         0.67944
 
 Excited state symmetry could not be determined.
 Excited State   3:   Singlet-?Sym    3.6812 eV  336.81 nm  f=0.0006
     163 ->165         0.70109
 
 Excited state symmetry could not be determined.
 Excited State   4:   Singlet-?Sym    3.6822 eV  336.72 nm  f=0.0004
     162 ->165         0.70114
 
 Excited state symmetry could not be determined.
 Excited State   5:   Singlet-?Sym    3.7302 eV  332.38 nm  f=0.0184
     161 ->165         0.69907
 
 Excited state symmetry could not be determined.
 Excited State   6:   Singlet-?Sym    3.7314 eV  332.27 nm  f=0.0181
     160 ->165         0.69901
 
 Excited state symmetry could not be determined.
 Excited State   7:   Singlet-?Sym    4.0240 eV  308.11 nm  f=0.0103
     160 ->166        -0.10933
     163 ->166         0.67287
 
 Excited state symmetry could not be determined.
 Excited State   8:   Singlet-?Sym    4.0256 eV  307.99 nm  f=0.0106
     162 ->166         0.67520
 
 Excited state symmetry could not be determined.
 Excited State   9:   Singlet-?Sym    4.0538 eV  305.85 nm  f=0.0009
     161 ->166         0.67344
     161 ->167        -0.11403
 
 Excited state symmetry could not be determined.
 Excited State  10:   Singlet-?Sym    4.0556 eV  305.71 nm  f=0.0012
     160 ->166         0.67133
     160 ->167        -0.11336
     163 ->166         0.11021
 
 Excited state symmetry could not be determined.
 Excited State  11:   Singlet-?Sym    4.1392 eV  299.54 nm  f=0.0000
     164 ->168         0.67515
     164 ->169        -0.13022
 
 Excited state symmetry could not be determined.
 Excited State  12:   Singlet-?Sym    4.1580 eV  298.18 nm  f=0.0003
     164 ->168         0.13219
     164 ->169         0.67172
 
 Excited state symmetry could not be determined.
 Excited State  13:   Singlet-?Sym    4.1938 eV  295.64 nm  f=0.0671
     164 ->167         0.67673
 
 Excited state symmetry could not be determined.
 Excited State  14:   Singlet-?Sym    4.6005 eV  269.50 nm  f=0.0000
     159 ->165         0.70353
 
 Excited state symmetry could not be determined.
 Excited State  15:   Singlet-?Sym    4.6432 eV  267.02 nm  f=0.0002
     158 ->165         0.70118
 
 Excited state symmetry could not be determined.
 Excited State  16:   Singlet-?Sym    4.6435 eV  267.01 nm  f=0.0002
     157 ->165         0.70096
 
 Excited state symmetry could not be determined.
 Excited State  17:   Singlet-?Sym    4.6722 eV  265.37 nm  f=0.0000
     155 ->165         0.10159
     156 ->165         0.68171
     157 ->166         0.11052
 
 Excited state symmetry could not be determined.
 Excited State  18:   Singlet-?Sym    4.6724 eV  265.36 nm  f=0.0000
     155 ->165         0.68173
     156 ->165        -0.10165
     158 ->166        -0.11106
 
 Excited state symmetry could not be determined.
 Excited State  19:   Singlet-?Sym    4.7387 eV  261.64 nm  f=0.0000
     156 ->165        -0.11563
     157 ->166         0.10396
     158 ->166         0.61149
     158 ->167        -0.18946
     160 ->167         0.14317
 
  Excited State  20:   Singlet-?Sym    4.7392 eV  261.61 nm  f=0.0000
     155 ->165        -0.11489
     157 ->166         0.60975
     157 ->167        -0.18883
     158 ->166        -0.10229
     161 ->167         0.14608
 Excited state symmetry could not be determined.


Singlet excited states of [Pt2(ì-P2O5H2)4]4- in water based on the SGS geometry

Excited State   1:   Singlet-?Sym    3.4470 eV  359.69 nm  f=0.3843
     164 ->165         0.67181
Excited state symmetry could not be determined.
 Excited State   2:   Singlet-?Sym    3.8408 eV  322.81 nm  f=0.0000
     164 ->166         0.67802
     164 ->167        -0.11301
 
 Excited state symmetry could not be determined.
 Excited State   3:   Singlet-?Sym    3.8595 eV  321.24 nm  f=0.0000
     164 ->166         0.11392
     164 ->167         0.67626
 
 Excited state symmetry could not be determined.
 Excited State   4:   Singlet-?Sym    4.4836 eV  276.53 nm  f=0.0148
     160 ->165         0.21512
     161 ->165        -0.12745
     162 ->165        -0.26903
     163 ->165         0.59193
 
 Excited state symmetry could not be determined.
 Excited State   5:   Singlet-?Sym    4.4853 eV  276.42 nm  f=0.0160
     160 ->165        -0.12049
     161 ->165        -0.18427
     162 ->165         0.60015
     163 ->165         0.27702
 
 Excited state symmetry could not be determined.
 Excited State   6:   Singlet-?Sym    4.4967 eV  275.72 nm  f=0.0032
     160 ->165         0.11021
     161 ->165         0.65032
     162 ->165         0.14576
     163 ->165         0.16654
 
 Excited state symmetry could not be determined.
 Excited State   7:   Singlet-?Sym    4.4993 eV  275.56 nm  f=0.0044
     160 ->165         0.64102
     161 ->165        -0.10369
     162 ->165         0.17831
     163 ->165        -0.17539
 
 Excited state symmetry could not be determined.
 Excited State   8:   Singlet-?Sym    4.8370 eV  256.32 nm  f=0.0000
     164 ->168         0.67576
     164 ->170        -0.14520
 
 Excited state symmetry could not be determined.
 Excited State   9:   Singlet-?Sym    4.9358 eV  251.20 nm  f=0.0000
     159 ->165         0.67922
 
 Excited state symmetry could not be determined.
 Excited State  10:   Singlet-?Sym    4.9367 eV  251.15 nm  f=0.0000
     158 ->165         0.67906
     163 ->167         0.10054
 
 Excited state symmetry could not be determined.
 Excited State  11:   Singlet-?Sym    5.0106 eV  247.44 nm  f=0.0010
     164 ->169         0.70225
 
 Excited state symmetry could not be determined.
 Excited State  12:   Singlet-?Sym    5.3199 eV  233.06 nm  f=0.0856
     150 ->165        -0.18315
     151 ->165         0.20746
     155 ->165         0.15535
     156 ->165         0.24306
     158 ->167        -0.15632
     162 ->166         0.35226
     163 ->166         0.39862
 
 Excited state symmetry could not be determined.
 Excited State  13:   Singlet-?Sym    5.3201 eV  233.05 nm  f=0.0845
     150 ->165         0.20693
     151 ->165         0.18068
     155 ->165         0.24047
     156 ->165        -0.15488
     159 ->167        -0.15551
     162 ->166         0.39808
     163 ->166        -0.35564
 
 Excited state symmetry could not be determined.
 Excited State  14:   Singlet-?Sym    5.3260 eV  232.79 nm  f=0.0013
     158 ->165        -0.12263
     158 ->166        -0.10379
     161 ->166        -0.31582
     162 ->167         0.15615
     163 ->167         0.55026
 
 Excited state symmetry could not be determined.
 Excited State  15:   Singlet-?Sym    5.3268 eV  232.76 nm  f=0.0028
     159 ->165         0.12077
     159 ->166        -0.10276
     160 ->166        -0.31231
     162 ->167         0.54926
     163 ->167        -0.15591
 
 Excited state symmetry could not be determined.
 Excited State  16:   Singlet-?Sym    5.3733 eV  230.74 nm  f=0.0018
     150 ->165        -0.11002
     156 ->165         0.13052
     158 ->166        -0.14669
     160 ->166        -0.33308
     161 ->166         0.44445
     163 ->166        -0.15650
     163 ->167         0.27486
 
 Excited state symmetry could not be determined.
 Excited State  17:   Singlet-?Sym    5.3743 eV  230.70 nm  f=0.0016
     151 ->165         0.10278
     155 ->165         0.12977
     159 ->166        -0.14081
     160 ->166         0.44421
     161 ->166         0.34633
     162 ->166        -0.14372
     162 ->167         0.27414
 
 Excited state symmetry could not be determined.
 Excited State  18:   Singlet-?Sym    5.3948 eV  229.82 nm  f=0.0005
     151 ->165        -0.18802
     155 ->165        -0.21359
     156 ->165        -0.18203
     158 ->167        -0.16963
     160 ->167         0.15805
     161 ->166         0.14376
     161 ->167         0.46791
     162 ->166         0.16797
     163 ->166         0.13910
 
 Excited state symmetry could not be determined.
 Excited State  19:   Singlet-?Sym    5.3963 eV  229.76 nm  f=0.0004
     150 ->165        -0.18180
     155 ->165        -0.17302
     156 ->165         0.20834
     159 ->167        -0.17706
     160 ->166         0.17419
     160 ->167         0.46500
     161 ->167        -0.15920
     162 ->166         0.13331
     163 ->166        -0.15511
 
 Excited state symmetry could not be determined.
 Excited State  20:   Singlet-?Sym    5.4991 eV  225.46 nm  f=0.0019
     150 ->166         0.14049
     150 ->167        -0.13243
     151 ->166        -0.11386
     151 ->167         0.10980
     156 ->166        -0.11003
     156 ->167         0.10093
     158 ->166         0.47879
     158 ->167        -0.29344
     161 ->167        -0.13356
     163 ->166        -0.13107
     163 ->167         0.12496
 
 Excited state symmetry could not be determined.


Triplet excited states of [Pt2(ì-P2O5H2)4]4- in the gas phase based on the SGS geometry

 Excited State   1:   Triplet-A      2.8144 eV  440.54 nm  f=0.0000
     164 ->166         0.67042
     164 ->167        -0.30552
 This state for optimization and/or second-order correction.
 Total Energy, E(RPA) =  -4480.17534660    
 Copying the excited state density for this state as the 1-particle RhoCI density.
 
 Excited State   2:   Triplet-A      2.9341 eV  422.56 nm  f=0.0000
     164 ->165         0.70670
 
 Excited State   3:   Triplet-A      3.6807 eV  336.85 nm  f=0.0000
     163 ->165         0.69888
 
 Excited State   4:   Triplet-A      3.6813 eV  336.80 nm  f=0.0000
     162 ->165         0.69890
 
 Excited State   5:   Triplet-A      3.7302 eV  332.38 nm  f=0.0000
     161 ->165         0.68254
     162 ->166        -0.17277


Triplet excited states of [Pt2(ì-P2O5H2)4]4- in water based on the SGS geometry

Excited State   1:   Triplet-A      2.8269 eV  438.59 nm  f=0.0000
     164 ->165         0.74006
 This state for optimization and/or second-order correction.
 Total Energy, E(RPA) =  -4480.99182653    
 Copying the excited state density for this state as the 1-particle RhoCI density.
 
 Excited State   2:   Triplet-A      3.5473 eV  349.52 nm  f=0.0000
     149 ->166         0.11082
     164 ->166        -0.27751
     164 ->167         0.64623
 
 Excited State   3:   Triplet-A      3.5683 eV  347.46 nm  f=0.0000
     149 ->167         0.11268
     164 ->166         0.64416
     164 ->167         0.27770
 
 Excited State   4:   Triplet-A      4.2682 eV  290.49 nm  f=0.0000
     163 ->165         0.70406
 
 Excited State   5:   Triplet-A      4.2690 eV  290.43 nm  f=0.0000
     162 ->165         0.70456
